# Supplementary material for: Discordance Between Physician- and Patient-Reported Disease Severity in Adults with Atopic Dermatitis: A US Cross-Sectional Survey
Source: Springer Nature journal article supplement (doi:10.1007/s40257-017-0284-y), 2017-04-26
Supplement: MOESM1 [file 17753258]

*American Journal of Clinical Dermatology*

**Discordance Between Physician- and Patient-Reported Disease Severity in Adults with Atopic Dermatitis: A  
United States Cross-Sectional Survey**

Wenhui Wei,<sup>1\*</sup> Peter Anderson,<sup>2</sup> Abhijit Gadkari,<sup>3</sup> Stuart Blackburn,<sup>2</sup> Rachel Moon,<sup>2</sup> James Piercy,<sup>2</sup> Shashank Shinde,<sup>1</sup>  
Jorge Gomez,<sup>3</sup> Eric Ghorayeb<sup>1</sup>

<sup>1</sup>Sanofi, Bridgewater, NJ, USA; <sup>2</sup>Adelphi Real World, Bollington, UK; <sup>3</sup>Regeneron, Tarrytown, NY, USA

\*Current address: Regeneron Pharmaceuticals, Inc. Tarrytown, NJ, USA

E-mail: wenhui.wei@regeneron.com

**Electronic Supplementary Material:**

**Physician- and Patient-Reported Data on Current Disease Status**

Electronic Supplementary Material Table 1. Physician-Reported Data: Current Disease Status at Clinic Visit

| Variable <sup>a</sup>                                 | Overall<br>(N = 678) | Matched<br>(n = 465) | Patient<br>assessed higher<br>(n = 76) | Physician<br>assessed higher<br>(n = 137) | p value |
|-------------------------------------------------------|----------------------|----------------------|----------------------------------------|-------------------------------------------|---------|
| <b>Total number of flares in the last 12 months</b>   |                      |                      |                                        |                                           |         |
| Mean ± SD                                             | 2.2 ± 2.1            | 2.1 ± 2.0            | 2.8 ± 2.3                              | 2.4 ± 2.4                                 | 0.0507  |
| Missing                                               | 129                  | 79                   | 21                                     | 29                                        |         |
| <b>Total number of baseline symptoms (day-to-day)</b> |                      |                      |                                        |                                           |         |
| Mean ± SD                                             | 5.4 ± 4.2            | 5.3 ± 4.2            | 5.5 ± 4.3                              | 6.0 ± 4.4                                 | 0.2220  |
| Missing                                               | 49                   | 26                   | 4                                      | 19                                        |         |
| <b>Pruritus / itching, n (%)</b>                      |                      |                      |                                        |                                           |         |
| Not present day to day                                | 164 (26.1)           | 121 (73.8)           | 18 (11.0)                              | 25 (15.2)                                 | 0.3660  |
| Present Day to day                                    | 465 (73.9)           | 318 (68.4)           | 54 (11.6)                              | 93 (20.0)                                 |         |
| Missing                                               | 49                   | 26                   | 4                                      | 19                                        |         |
| <b>Swelling, n (%)</b>                                |                      |                      |                                        |                                           |         |
| Not present day to day                                | 365 (58.0)           | 255 (69.9)           | 45 (12.3)                              | 65 (17.8)                                 | 0.6030  |
| Present Day to day                                    | 264 (42.0)           | 184 (69.7)           | 27 (10.2)                              | 53 (20.1)                                 |         |
| Missing (n)                                           | 49                   | 26                   | 4                                      | 19                                        |         |
| <b>Cracking / raw areas, n (%)</b>                    |                      |                      |                                        |                                           |         |
| Not present day to day                                | 299 (47.5)           | 208 (69.6)           | 36 (12.0)                              | 55 (18.4)                                 | 0.8958  |
| Present Day to day                                    | 330 (52.5)           | 231 (70.0)           | 36 (10.9)                              | 63 (19.1)                                 |         |
| Missing                                               | 49                   | 26                   | 4                                      | 19                                        |         |
| <b>Pain / soreness, n (%)</b>                         |                      |                      |                                        |                                           |         |
| Not present day to day                                | 348 (55.3)           | 250 (71.8)           | 40 (11.5)                              | 58 (16.7)                                 | 0.3185  |
| Present Day to day                                    | 281 (44.7)           | 189 (67.3)           | 32 (11.4)                              | 60 (21.4)                                 |         |
| Missing                                               | 49                   | 26                   | 4                                      | 19                                        |         |
| <b>Blistering (non-oozing), n (%)</b>                 |                      |                      |                                        |                                           |         |
| Not present day to day                                | 536 (85.2)           | 377 (70.3)           | 63 (11.8)                              | 96 (17.9)                                 | 0.3974  |
| Present Day to day                                    | 93 (14.8)            | 62 (66.7)            | 9 (9.7)                                | 22 (23.7)                                 |         |
| Missing                                               | 49                   | 26                   | 4                                      | 19                                        |         |

| <b>Variable<sup>a</sup></b>       | <b>Overall<br/>(N = 678)</b> | <b>Matched<br/>(n = 465)</b> | <b>Patient<br/>assessed higher<br/>(n = 76)</b> | <b>Physician<br/>assessed higher<br/>(n = 137)</b> | <b>p value</b> |
|-----------------------------------|------------------------------|------------------------------|-------------------------------------------------|----------------------------------------------------|----------------|
| <b>Blistering (oozing), n (%)</b> |                              |                              |                                                 |                                                    |                |
| Not present day to day            | 558 (88.7)                   | 392 (70.3)                   | 62 (11.1)                                       | 104 (18.6)                                         | 0.7139         |
| Present Day to day                | 71 (11.3)                    | 47 (66.2)                    | 10 (14.1)                                       | 14 (19.7)                                          |                |
| Missing                           | 49                           | 26                           | 4                                               | 19                                                 |                |
| <b>Crusting, n (%)</b>            |                              |                              |                                                 |                                                    |                |
| Not present day to day            | 415 (66.0)                   | 291 (70.1)                   | 52 (12.5)                                       | 72 (17.3)                                          | 0.2776         |
| Present Day to day                | 214 (34.0)                   | 148 (69.2)                   | 20 (9.3)                                        | 46 (21.5)                                          |                |
| Missing                           | 49                           | 26                           | 4                                               | 19                                                 |                |
| <b>Scaling, n (%)</b>             |                              |                              |                                                 |                                                    |                |
| Not present day to day            | 299 (47.5)                   | 213 (71.2)                   | 36 (12.0)                                       | 50 (16.7)                                          | 0.4478         |
| Present Day to day                | 330 (52.5)                   | 226 (68.5)                   | 36 (10.9)                                       | 68 (20.6)                                          |                |
| Missing                           | 49                           | 26                           | 4                                               | 19                                                 |                |
| <b>Papules, n (%)</b>             |                              |                              |                                                 |                                                    |                |
| Not present day to day            | 479 (76.2)                   | 346 (72.2)                   | 52 (10.9)                                       | 81 (16.9)                                          | 0.0500         |
| Present Day to day                | 150 (23.8)                   | 93 (62.0)                    | 20 (13.3)                                       | 37 (24.7)                                          |                |
| Missing                           | 49                           | 26                           | 4                                               | 19                                                 |                |
| <b>Skin colour change, n (%)</b>  |                              |                              |                                                 |                                                    |                |
| Not present day to day            | 408 (64.9)                   | 297 (72.8)                   | 41 (10.0)                                       | 70 (17.2)                                          | 0.0792         |
| Present Day to day                | 221 (35.1)                   | 142 (64.3)                   | 31 (14.0)                                       | 48 (21.7)                                          |                |
| Missing                           | 49                           | 26                           | 4                                               | 19                                                 |                |
| <b>Infection in the skin</b>      |                              |                              |                                                 |                                                    |                |
| Not present day to day            | 556 (88.4)                   | 389 (70.0)                   | 62 (11.2)                                       | 105 (18.9)                                         | 0.8083         |
| Present Day to day                | 73 (11.6)                    | 50 (68.5)                    | 10 (13.7)                                       | 13 (17.8)                                          |                |
| Missing                           | 49                           | 26                           | 4                                               | 19                                                 |                |
| <b>EASI, mean score ± SD</b>      | <b>9.3 ± 8.3</b>             | <b>9.2 ± 8.7</b>             | <b>9.5 ± 7.6</b>                                | <b>9.5 ± 7.1</b>                                   | <b>0.5308</b>  |

| Variable <sup>a</sup>                                    | Overall<br>(N = 678) | Matched<br>(n = 465) | Patient<br>assessed higher<br>(n = 76) | Physician<br>assessed higher<br>(n = 137) | p value |
|----------------------------------------------------------|----------------------|----------------------|----------------------------------------|-------------------------------------------|---------|
| <b>EASI score group, n (%)</b>                           |                      |                      |                                        |                                           |         |
| 0 – <5                                                   | 243 (35.8)           | 171 (70.4)           | 26 (10.7)                              | 46 (18.9)                                 | 0.7774  |
| 5 – <10                                                  | 177 (26.1)           | 117 (66.1)           | 22 (12.4)                              | 38 (21.5)                                 |         |
| 10 – <15                                                 | 122 (18.0)           | 89 (73.0)            | 13 (10.7)                              | 20 (16.4)                                 |         |
| 15 – <20                                                 | 91 (13.4)            | 58 (63.7)            | 8 ( 8.8)                               | 25 (27.5)                                 |         |
| 20+                                                      | 45 (6.6)             | 30 (66.7)            | 7 (15.6)                               | 8 (17.8)                                  |         |
| <b>Mean ± SD current BSA affected, %</b>                 | 15.2 ± 13.5          | 15.3 ± 13.9          | 15.1 ± 13.0                            | 14.8 ± 12.6                               | 0.9872  |
| <b>Current BSA affected group, n (%)</b>                 |                      |                      |                                        |                                           |         |
| 0 – <5%                                                  | 148 (21.8)           | 106 (71.6)           | 16 (10.8)                              | 26 (17.6)                                 | 0.9939  |
| 5 – <10%                                                 | 125 (18.4)           | 74 (59.2)            | 17 (13.6)                              | 34 (27.2)                                 |         |
| 10 – <15%                                                | 128 (18.9)           | 93 (72.7)            | 10 (7.8)                               | 25 (19.5)                                 |         |
| 15 – <20%                                                | 95 (14.0)            | 73 (76.8)            | 11 (11.6)                              | 11 (11.6)                                 |         |
| 20 – <25%                                                | 65 ( 9.6)            | 43 (66.2)            | 9 (13.8)                               | 13 (20.0)                                 |         |
| 25 – <30%                                                | 45 ( 6.6)            | 25 (55.6)            | 4 ( 8.9)                               | 16 (35.6)                                 |         |
| 30+%                                                     | 72 (10.6)            | 51 (70.8)            | 9 (12.5)                               | 12 (16.7)                                 |         |
| <b>Number of other atopic conditions</b>                 |                      |                      |                                        |                                           |         |
| Mean ± SD                                                | 1.1 ± 1.2            | 1.0 ± 1.1            | 1.3 ± 1.2                              | 1.2 ± 1.4                                 | 0.4360  |
| Missing                                                  | 63                   | 38                   | 4                                      | 21                                        |         |
| <b>Presence of inflammatory atopic conditions, n (%)</b> | 346 (51.0)           | 244 (70.5)           | 42 (12.1)                              | 60 (17.3)                                 | 0.1494  |
| <b>Presence of comorbidities, n (%)</b>                  | 553 (81.6)           | 377 (68.2)           | 63 (11.4)                              | 113 (20.4)                                | 0.8869  |
| <b>Presence of depression, n (%)</b>                     | 56 ( 8.3)            | 34 (60.7)            | 7 (12.5)                               | 15 (26.8)                                 | 0.3773  |
| <b>Presence of anxiety, n (%)</b>                        | 99 (14.6)            | 63 (63.6)            | 13 (13.1)                              | 23 (23.2)                                 | 0.5166  |
| <b>Hospitalised due to AD at any time, n (%)</b>         | 74 (10.9)            | 43 (58.1)            | 10 (13.5)                              | 21 (28.4)                                 | 0.1071  |

| <b>Variable<sup>a</sup></b>                                               | <b>Overall<br/>(N = 678)</b> | <b>Matched<br/>(n = 465)</b> | <b>Patient<br/>assessed higher<br/>(n = 76)</b> | <b>Physician<br/>assessed higher<br/>(n = 137)</b> | <b>p value</b> |
|---------------------------------------------------------------------------|------------------------------|------------------------------|-------------------------------------------------|----------------------------------------------------|----------------|
| <b>Current treatment, n (%)</b>                                           |                              |                              |                                                 |                                                    |                |
| Any systemic agent or phototherapy                                        | 320 (47.2)                   | 211 (65.9)                   | 40 (12.5)                                       | 69 (21.6)                                          | 0.3551         |
| Non-systemics                                                             | 358 (52.8)                   | 254 (70.9)                   | 36 (10.1)                                       | 68 (19.0)                                          |                |
| <b>Currently on systemic immunosuppressant, n (%)</b>                     | 174 (25.7)                   | 118 (67.8)                   | 19 (10.9)                                       | 37 (21.3)                                          | 0.9197         |
| <b>Physician satisfaction with current control of patient's AD, n (%)</b> |                              |                              |                                                 |                                                    |                |
| Not satisfied                                                             | 188 (27.7)                   | 116 (61.7)                   | 25 (13.3)                                       | 47 (25.0)                                          | 0.0562         |
| Satisfied                                                                 | 490 (72.3)                   | 349 (71.2)                   | 51 (10.4)                                       | 90 (18.4)                                          |                |

<sup>a</sup>Data available for all patients for all variables unless indicated as missing  
BSA, body surface area; EASI, Eczema Area and Severity Index

Electronic Supplementary Material Table 2. Physician-Reported Data: Quality of Life

| Variable <sup>a</sup>                                                                                     | Overall<br>(N = 678) | Matched<br>(n = 465) | Patient<br>assessed higher<br>(n = 76) | Physician<br>assessed higher<br>(n = 137) | p value |
|-----------------------------------------------------------------------------------------------------------|----------------------|----------------------|----------------------------------------|-------------------------------------------|---------|
| <b>Impairment in ability to conduct normal daily activities / errands / tasks, n (%)</b>                  |                      |                      |                                        |                                           |         |
| No impairment                                                                                             | 198 (29.4)           | 145 (73.2)           | 21 (10.6)                              | 32 (16.2)                                 | 0.2351  |
| Impairment                                                                                                | 475 (70.6)           | 318 (66.9)           | 55 (11.6)                              | 102 (21.5)                                |         |
| Missing                                                                                                   | 5                    | 2                    | 0                                      | 3                                         |         |
| <b>Itching interference,<sup>b</sup> n (%)</b>                                                            |                      |                      |                                        |                                           |         |
| None at all [0-3]                                                                                         | 363 (54.3)           | 248 (68.3)           | 40 (11.0)                              | 75 (20.7)                                 | 0.9510  |
| Interference [4-6]                                                                                        | 305 (45.7)           | 211 (69.2)           | 34 (11.1)                              | 60 (19.7)                                 |         |
| Missing                                                                                                   | 10                   | 6                    | 2                                      | 2                                         |         |
| <b>Sleep disturbance interference,<sup>b</sup> n (%)</b>                                                  |                      |                      |                                        |                                           |         |
| None at all [0-3]                                                                                         | 531 (80.6)           | 377 (71.0)           | 51 (9.6)                               | 103 (19.4)                                | 0.0310  |
| Interference [4-6]                                                                                        | 128 (19.4)           | 77 (60.2)            | 21 (16.4)                              | 30 (23.4)                                 |         |
| Missing                                                                                                   | 19                   | 11                   | 4                                      | 4                                         |         |
| <b>Patients condition is a major problem in everyday life,<sup>b</sup> n (%)</b>                          |                      |                      |                                        |                                           |         |
| Disagree [0-3]                                                                                            | 463 (68.3)           | 313 (67.6)           | 54 (11.7)                              | 96 (20.7)                                 | 0.7141  |
| Agree [4-6]                                                                                               | 215 (31.7)           | 152 (70.7)           | 22 (10.2)                              | 41 (19.1)                                 |         |
| <b>Patient is very knowledgeable about their condition,<sup>b</sup> n (%)</b>                             |                      |                      |                                        |                                           |         |
| Disagree [0-3]                                                                                            | 295 (43.5)           | 202 (68.5)           | 32 (10.8)                              | 61 (20.7)                                 | 0.9421  |
| Agree [4-6]                                                                                               | 383 (56.5)           | 263 (68.7)           | 44 (11.5)                              | 76 (19.8)                                 |         |
| <b>Patient has learned to manage their condition over a long period,<sup>b</sup> n (%)</b>                |                      |                      |                                        |                                           |         |
| Disagree [0-3]                                                                                            | 230 (33.9)           | 151 (65.7)           | 23 (10.0)                              | 56 (24.3)                                 | 0.1467  |
| Agree [4-6]                                                                                               | 448 (66.1)           | 314 (70.1)           | 53 (11.8)                              | 81 (18.1)                                 |         |
| <b>Patient is not actively involved in the treatment decisions for their condition,<sup>b</sup> n (%)</b> |                      |                      |                                        |                                           |         |
| Disagree [0-3]                                                                                            | 595 (87.8)           | 409 (68.7)           | 69 (11.6)                              | 117 (19.7)                                | 0.5032  |
| Agree [4-6]                                                                                               | 83 (12.2)            | 56 (67.5)            | 7 (8.4)                                | 20 (24.1)                                 |         |

| <b>Variable<sup>a</sup></b>                                                                                                         | <b>Overall<br/>(N = 678)</b> | <b>Matched<br/>(n = 465)</b> | <b>Patient<br/>assessed higher<br/>(n = 76)</b> | <b>Physician<br/>assessed higher<br/>(n = 137)</b> | <b>p value</b> |
|-------------------------------------------------------------------------------------------------------------------------------------|------------------------------|------------------------------|-------------------------------------------------|----------------------------------------------------|----------------|
| <b>Patient is always keen to try the next new treatment for their condition,<sup>b</sup> n (%)</b>                                  |                              |                              |                                                 |                                                    |                |
| Disagree [0-3]                                                                                                                      | 416 (61.4)                   | 279 (67.1)                   | 47 (11.3)                                       | 90 (21.6)                                          | 0.4836         |
| Agree [4-6]                                                                                                                         | 262 (38.6)                   | 186 (71.0)                   | 29 (11.1)                                       | 47 (17.9)                                          |                |
| <b>Patient is very concerned about the possible side effects of treatment,<sup>b</sup> n (%)</b>                                    |                              |                              |                                                 |                                                    |                |
| Disagree [0-3]                                                                                                                      | 434 (64.0)                   | 303 (69.8)                   | 48 (11.1)                                       | 83 (19.1)                                          | 0.6102         |
| Agree [4-6]                                                                                                                         | 244 (36.0)                   | 162 (66.4)                   | 28 (11.5)                                       | 54 (22.1)                                          |                |
| <b>Patient has become despondent in achieving better outcomes due to poor performance of available therapies,<sup>b</sup> n (%)</b> |                              |                              |                                                 |                                                    |                |
| Disagree [0-3]                                                                                                                      | 612 (90.3)                   | 422 (69.0)                   | 63 (10.3)                                       | 127 (20.8)                                         | 0.0567         |
| Agree [4-6]                                                                                                                         | 66 (9.7)                     | 43 (65.2)                    | 13 (19.7)                                       | 10 (15.2)                                          |                |

<sup>a</sup>Data available for all patients for all variables unless indicated as missing

<sup>b</sup>Rated on a scale of 0-6

**Electronic Supplementary Material Table 3. Patient-Reported Data: Satisfaction with Current Treatment and Quality of Life**

| Variable <sup>a</sup>                                                                       | Overall<br>(N = 678) | Matched<br>(n = 465) | Patient<br>assessed higher<br>(n = 76) | Physician<br>assessed higher<br>(n = 137) | p value |
|---------------------------------------------------------------------------------------------|----------------------|----------------------|----------------------------------------|-------------------------------------------|---------|
| <b>Patient-reported satisfaction with how current treatment helps ad,<sup>b</sup> n (%)</b> |                      |                      |                                        |                                           |         |
| Not satisfied                                                                               | 143 (24.2)           | 91 (63.6)            | 24 (16.8)                              | 28 (19.6)                                 | 0.0687  |
| Satisfied                                                                                   | 447 (75.8)           | 317 (70.9)           | 44 (9.8)                               | 86 (19.2)                                 |         |
| Missing                                                                                     | 88                   | 57                   | 8                                      | 23                                        |         |
| <b>Itching experienced at baseline,<sup>b</sup> n (%)</b>                                   |                      |                      |                                        |                                           |         |
| No                                                                                          | 314 (46.3)           | 204 (65.0)           | 35 (11.1)                              | 75 (23.9)                                 | 0.0807  |
| Yes                                                                                         | 364 (53.7)           | 261 (71.7)           | 41 (11.3)                              | 62 (17.0)                                 |         |
| <b>Pain / soreness due to AD experienced at baseline,<sup>b</sup> n (%)</b>                 |                      |                      |                                        |                                           |         |
| No                                                                                          | 498 (73.5)           | 332 (66.7)           | 56 (11.2)                              | 110 (22.1)                                | 0.1168  |
| Yes                                                                                         | 180 (26.5)           | 133 (73.9)           | 20 (11.1)                              | 27 (15.0)                                 |         |
| <b>Sleep disruption / insomnia due to AD experienced at baseline,<sup>b</sup> n (%)</b>     |                      |                      |                                        |                                           |         |
| No                                                                                          | 599 (88.3)           | 415 (69.3)           | 62 (10.4)                              | 122 (20.4)                                | 0.1485  |
| Yes                                                                                         | 79 (11.7)            | 50 (63.3)            | 14 (17.7)                              | 15 (19.0)                                 |         |
| <b>DLQI</b>                                                                                 |                      |                      |                                        |                                           |         |
| Mean ± SD                                                                                   | 7.05 ± 6.11          | 7.02 ± 6.02          | 9.74 ± 6.49                            | 5.65 ± 5.75                               | <0.0001 |
| 95% CI                                                                                      | 6.57, 7.52           | 6.45, 7.59           | 8.21, 11.26                            | 4.65, 6.64                                |         |
| Missing                                                                                     | 43                   | 32                   | 4                                      | 7                                         |         |
| <b>EQ-5D</b>                                                                                |                      |                      |                                        |                                           |         |
| Mean ± SD                                                                                   | 0.88 ± 0.14          | 0.89 ± 0.13          | 0.81 ± 0.16                            | 0.89 ± 0.14                               | 0.0003  |
| 95% CI                                                                                      | 0.87, 0.89           | 0.87, 0.90           | 0.78, 0.85                             | 0.86, 0.91                                |         |
| Missing                                                                                     | 21                   | 16                   | 2                                      | 3                                         |         |
| <b>WPAI: percent overall work impairment due to problem</b>                                 |                      |                      |                                        |                                           |         |
| Mean ± SD                                                                                   | 20.9 ± 21.53         | 20.18 ± 20.05        | 29.25 ± 25.33                          | 19.21 ± 24.18                             | 0.0319  |
| 95% CI                                                                                      | 18.83, 22.98         | 17.91, 22.46         | 21.26, 37.25                           | 13.65, 24.77                              |         |
| Missing                                                                                     | 262                  | 165                  | 35                                     | 62                                        |         |

<sup>a</sup>Data available for all patients for all variables unless indicated as missing

<sup>b</sup>Data from patient self-completion form



CI, confidence interval; DLQI, dermatology life quality index; WPAI, work productivity and activity impairment
